# Supplementary material for: Global metabolomic profiling of trastuzumab resistant gastric cancer cells reveals major metabolic pathways and metabolic signatures based on UHPLC-Q exactive-MS/MS
Source: Royal Society of Chemistry journal article supplement (doi:10.1039/c9ra06607a), 2019-01-01
Supplement: c9ra06607a1.pdf [file c9ra06607a1.pdf]

### Supporting Information

Global metabolomic profiling of trastuzumab resistant gastric cancer cells reveals major metabolic pathways and metabolic signatures based on UHPLC-Q Exactive-MS/MS

Wenhu Liu, ‡<sup>a</sup> Qiang Wang, ‡<sup>b</sup> and Jinxia Chang <sup>\*a</sup>

<sup>a</sup> School of Pharmacy, School of Basic Medical Sciences, North Sichuan Medical College, Nanchong 637100, China. E-mail: [jinxiachang@163.com](mailto:jinxiachang@163.com); wenhuliu@cqu.edu.cn

<sup>b</sup> Department of Laboratory Medicine, Affiliated Hospital of North Sichuan Medical College; Faculty of Laboratory Medicine, Center for Translational Medicine, North Sichuan Medical College, Nanchong 637000, China. E-mail: wqiang\_1981@126.com

## Figure legends

Fig. S1 The TICs from all QC samples based on UHPLC-Q Exactive-MS/MS in POS (A) and NEG ion modes (B).

Fig. S2 Spearman's correlation coefficients were calculated to assess the experiment reproducibility. The lower-left half shows pairwise scatter plots of QC samples. The upper-right half shows pairwise Spearman's correlation coefficients for the same comparison.

Fig. S3 The TICs of standard compound (2-chloro-L-phenylalanine) based on UHPLC-Q Exactive-MS/MS in POS (A) and NEG ion modes (B).

Fig. S4 (A, B) OPLS-DA scores plot between NCI N87 and NCI N87/R cells, (C, D) MKN45 and MKN45/R cells in POS and NEG ion modes respectively.

Fig. S5 Heatmap produced by hierarchical clustering analysis of NCI N87 and NCI N87/R cells (A, B), MKN45 and MKN45/R cells (C, D) in POS and NEG ion modes respectively. The increased and decreased variables are represented by range of red and blue intensities, respectively.

Table S1. Response stability of internal standard from QCs.

Table S2. Differential metabolites shared in NCI N87, NCI N87/R and MKN45, MKN45/R cell lines.

Table S3. Differential metabolites in NCI N87 and NCI N87/R cells.

Table S4. Differential metabolites in MKN45 and MKN45/R cells.

Fig. S1 The TICs from all QC samples based on UHPLC-Q Exactive-MS/MS in POS (A) and

NEG (B) ion modes.

(A)

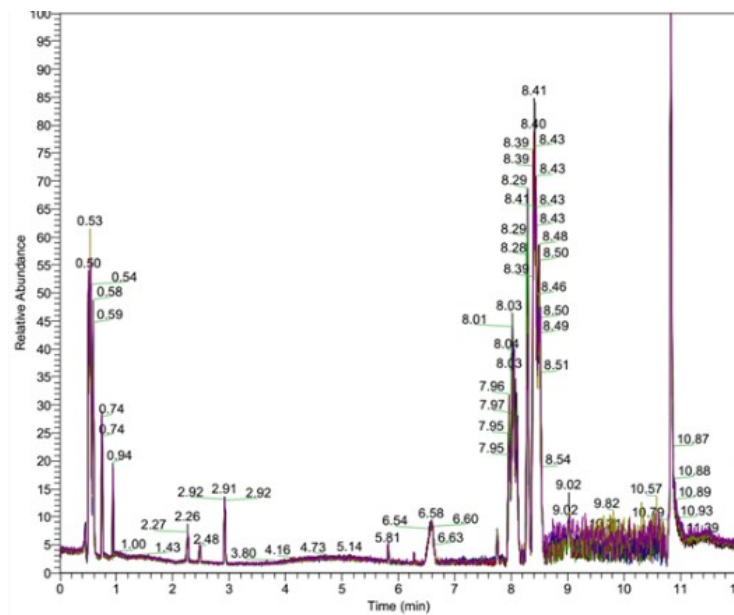

(B)

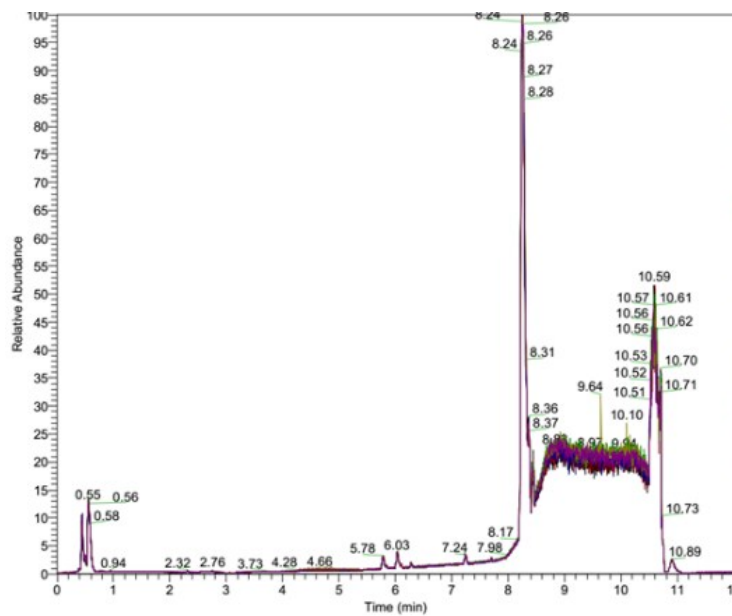

Fig. S2 Spearman's correlation coefficients from QC samples were calculated to assess the

experiment reproducibility in POS (A) and NEG (B) ion models. The lower-left half shows pairwise scatter plots of QC samples. The upper-right half shows pairwise Spearman's correlation coefficients for the same comparison.

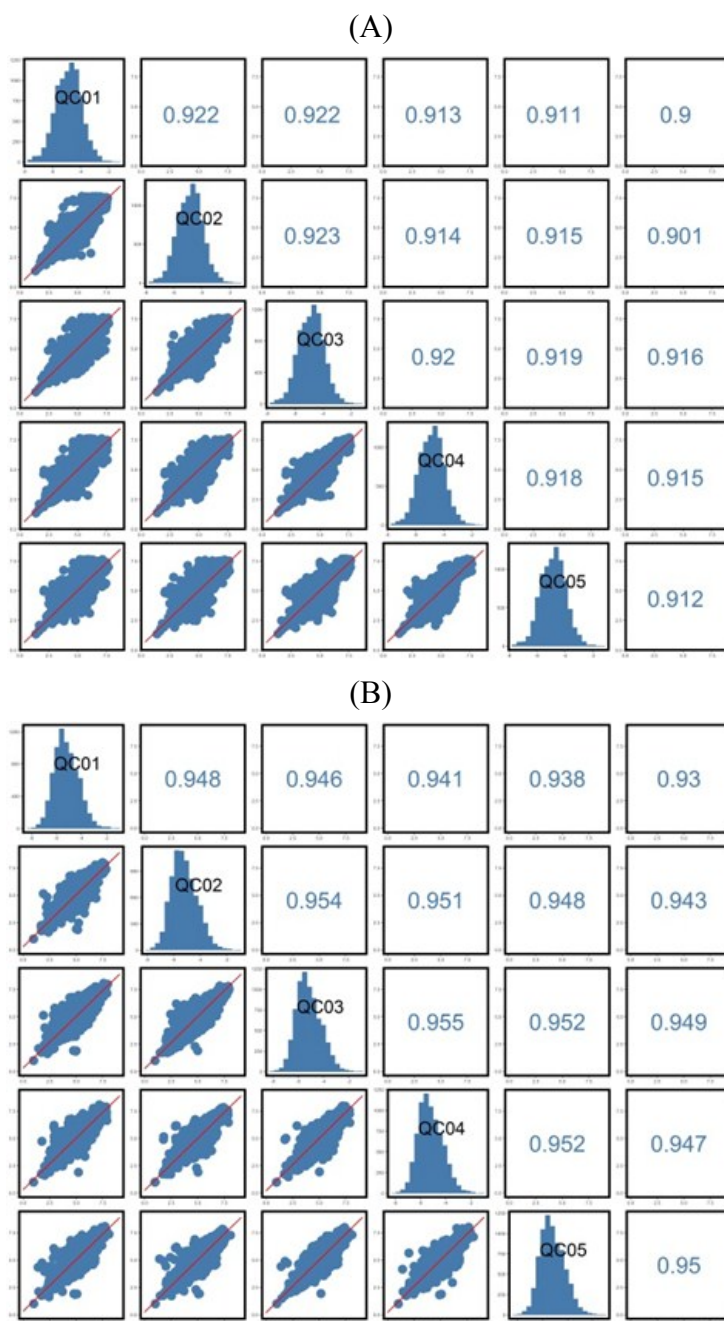

Fig. S3 The TICs of standard compound (2-chloro-L-phenylalanine) based on UHPLC-Q

Exacte-MS/MS in POS (A) and NEG(B) ion modes respectively.

(A)

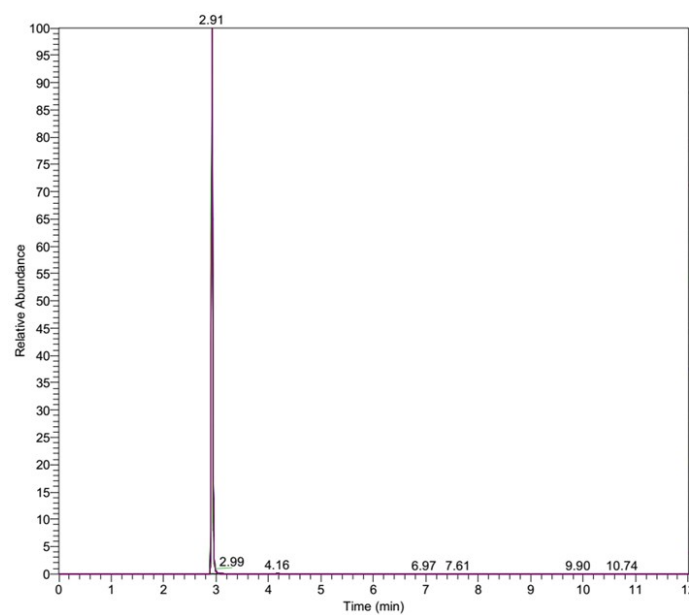

(B)

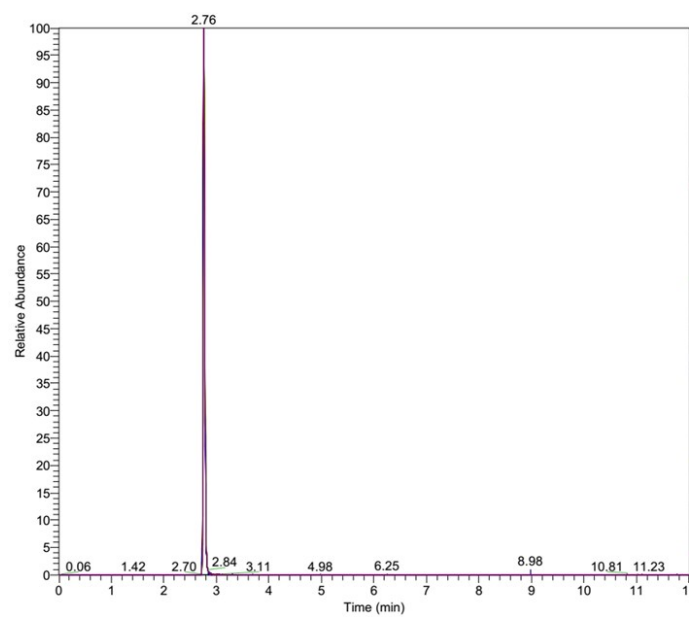

Fig. S4 OPLS-DA score plots between NCI N87 and NCI N87/R cells, MKN45 and MKN45/R

cells in POS and NEG ion modes respectively.

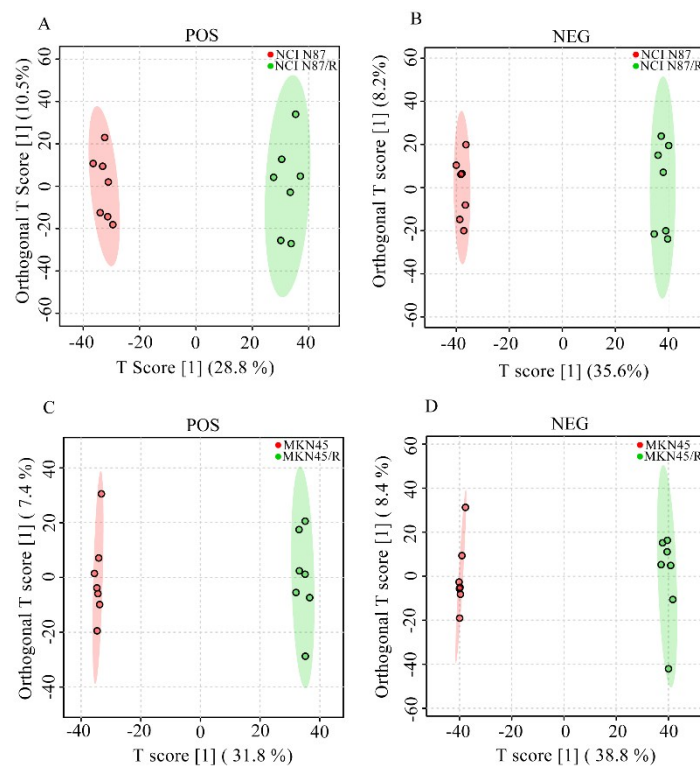

Fig. S5 Heatmap produced by hierarchical clustering analysis of NCI N87 and NCI N87/R cells

(A, B), MKN45 and MKN45/R cells (C, D) in POS and NEG ion modes respectively. The increased and decreased variables are represented by range of red and blue intensities, respectively.

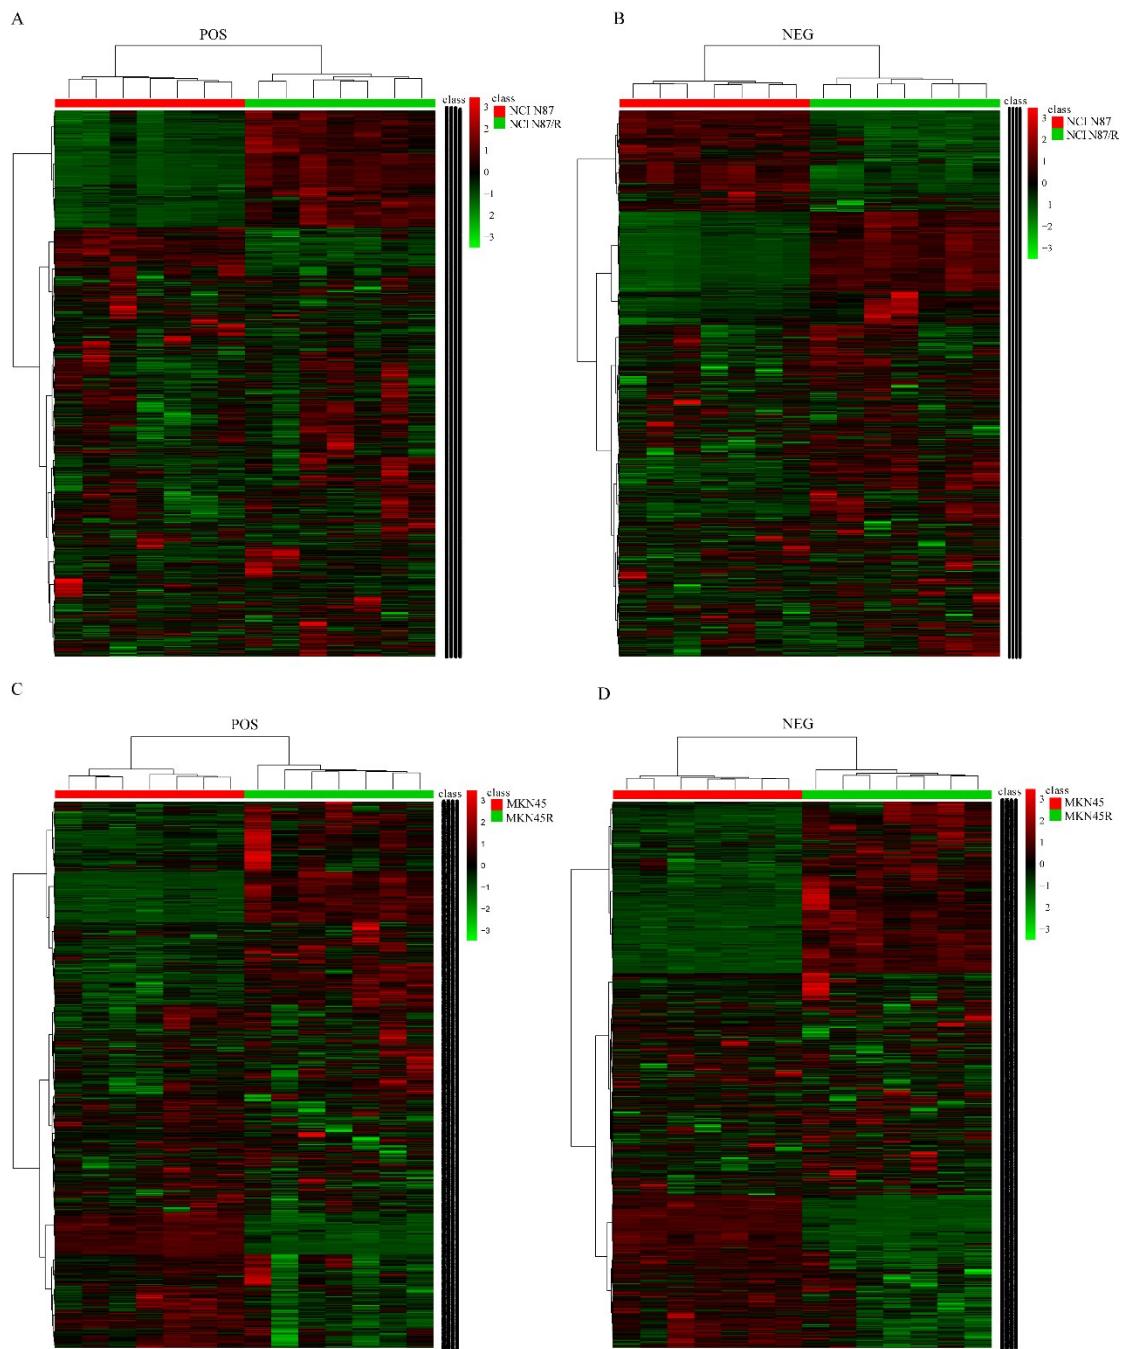

Table S1. Response stability of internal standard from QC samples.

| Internal standard | Positive | Negative |
|-------------------|----------|----------|
|-------------------|----------|----------|

|                          |                 |                   |              |                |                  |              |
|--------------------------|-----------------|-------------------|--------------|----------------|------------------|--------------|
| 2-chloro-L-phenylalanine | m/z<br>200.0471 | RT(s)<br>175.5295 | RSD<br>4.53% | m/z<br>198.033 | RT(s)<br>165.894 | RSD<br>1.88% |
|--------------------------|-----------------|-------------------|--------------|----------------|------------------|--------------|

Table S2. Differential metabolites shared in NCI N87, NCI N87/R and MKN45, MKN45/R cell lines

| No | Metabolites                        | HMDB        | KEGG   | Tread (NCI<br>N87R/NCI N87) | Tread<br>(MKN45R/MKN45) |
|----|------------------------------------|-------------|--------|-----------------------------|-------------------------|
| 1  | Gluconic acid                      | HMDB0000625 | C00257 | Up                          | Up                      |
| 2  | NAD                                | HMDB0000902 | C00003 | Up                          | Up                      |
| 3  | creatine                           | HMDB0000064 | C00300 | Up                          | Down                    |
| 4  | L-valine                           | HMDB0000883 | C00183 | Up                          | Up                      |
| 5  | L-threonine                        | HMDB0000167 | C00188 | Up                          | Up                      |
| 6  | pantothenic Acid                   | HMDB0000210 | C00864 | Up                          | Up                      |
| 7  | L-carnitine                        | HMDB0000062 | C00318 | Up                          | Down                    |
| 8  | fumaric acid                       | HMDB0000134 | C00122 | Up                          | Up                      |
| 9  | guanosine                          | HMDB0000133 | C00387 | Up                          | Up                      |
| 10 | pyroglutamic acid                  | HMDB0000267 | C01879 | Up                          | Up                      |
| 11 | 2'-deoxyguanosine 5'-monophosphate | HMDB0001044 | C00362 | Up                          | Down                    |
| 12 | thiamine                           | HMDB0000235 | C00378 | Up                          | Up                      |
| 13 | S-adenosylmethionine               | HMDB0001185 | C00019 | Up                          | Down                    |
| 14 | glyceric acid                      | HMDB0000139 | C00258 | Up                          | Up                      |
| 15 | palmitoylethanolamide              | HMDB0002100 | C16512 | Up                          | Up                      |
| 16 | L-histidine                        | HMDB0000177 | C00135 | Up                          | Up                      |
| 17 | citrulline                         | HMDB0000904 | C00327 | Up                          | Up                      |
| 18 | L-proline                          | HMDB0000162 | C00148 | Up                          | Up                      |
| 19 | phosphoric acid                    | HMDB0002142 | C00009 | Up                          | Up                      |
| 20 | S-acetyldihydrolipoamide-E         | HMDB0006878 | C16255 | Up                          | Down                    |
| 21 | L-tyrosine                         | HMDB0000158 | C00082 | Up                          | Up                      |
| 22 | adenosine                          | HMDB0000050 | C00212 | Up                          | Up                      |
| 23 | adenine                            | HMDB0000034 | C00147 | Up                          | Up                      |
| 24 | taurine                            | HMDB0000251 | C00245 | Up                          | Up                      |
| 25 | inosine                            | HMDB0000195 | C00294 | Up                          | Up                      |
| 26 | phosphoenolpyruvic acid            | HMDB0000263 | C00074 | Up                          | Up                      |
| 27 | citric acid                        | HMDB0000094 | C00158 | Up                          | Up                      |
| 28 | NADP                               | HMDB0000217 | C00006 | Up                          | Up                      |
| 29 | phosphocholine                     | HMDB0001565 | C00588 | Up                          | Up                      |
| 30 | L-norleucine                       | HMDB0001645 | C01933 | Up                          | Down                    |
| 31 | malic acid                         | HMDB0000744 | C00711 | Up                          | Up                      |
| 32 | 3-phosphoglyceric acid             | HMDB0000807 | C00597 | Up                          | Up                      |



|    |                                         |             |        |      |      |
|----|-----------------------------------------|-------------|--------|------|------|
| 33 | cellobiose                              | HMDB0000055 | C06422 | Down | Down |
| 34 | L-acetylcarnitine                       | HMDB0000201 | C02571 | Up   | Down |
| 35 | niacinamide                             | HMDB0001406 | C00153 | Up   | Down |
| 36 | L-leucine                               | HMDB0000687 | C00123 | Up   | Up   |
| 37 | uridine diphosphate glucuronic acid     | HMDB0000935 | C00167 | Up   | Down |
| 38 | guanine                                 | HMDB0000132 | C00242 | Up   | Up   |
| 39 | choline                                 | HMDB0000097 | C00114 | Up   | Up   |
| 40 | cytidine                                | HMDB0000089 | C00475 | Up   | Down |
| 41 | L-glutamine                             | HMDB0000641 | C00064 | Up   | Up   |
| 42 | N-acetylneuraminic acid                 | HMDB0000230 | C19910 | Up   | Down |
| 43 | L-glutamic acid                         | HMDB0000148 | C00025 | Up   | Up   |
| 44 | uridine 5'-diphosphate                  | HMDB0000295 | C00015 | Up   | Down |
| 45 | phytosphingosine                        | HMDB0004610 | C12144 | Up   | Down |
| 46 | uridine 5'-monophosphate                | HMDB0000288 | C00105 | Up   | Down |
| 47 | glyceraldehyde                          | HMDB0001051 | C02154 | Up   | Down |
| 48 | L-aspartic acid                         | HMDB0000191 | C00049 | Up   | Up   |
| 49 | eicosenoic acid                         | HMDB0002231 | C16526 | Up   | Up   |
| 50 | L-methionine                            | HMDB0000696 | C00073 | Up   | Up   |
| 51 | phosphocreatine                         | HMDB0001511 | C02305 | Up   | Up   |
| 52 | L-phenylalanine                         | HMDB0000159 | C00079 | Up   | Up   |
| 53 | uridine diphosphate-N-acetylglucosamine | HMDB0000290 | C00043 | Up   | Down |
| 54 | octadecanamide                          | HMDB0034146 | C13846 | Down | Up   |

Table S3. Differential metabolites in NCI N87 and NCI N87/R cells.

| No | Metabolites | HMDB | KEGG | tread (NCI N87R/NCI |
|----|-------------|------|------|---------------------|
|----|-------------|------|------|---------------------|

| 87) |                                                |             |        |      |
|-----|------------------------------------------------|-------------|--------|------|
| 1   | butyrylcarnitine                               | HMDB0002013 | C02862 | Up   |
| 2   | xanthine                                       | HMDB0000292 | C00385 | Up   |
| 3   | palmitoleic acid                               | HMDB0003229 | C08362 | Down |
| 4   | 5'-methylthioadenosine                         | HMDB0001173 | C00170 | Up   |
| 5   | nicotinamide                                   | HMDB0001406 | C00153 | Up   |
| 6   | cysteinylglycine                               | HMDB0000078 | C01419 | Up   |
| 7   | sphinganine 1-phosphate                        | HMDB0001383 | C01120 | Up   |
| 8   | lysoPE(18:0)                                   | HMDB0011129 | -      | Up   |
| 9   | acetylcholine                                  | HMDB0000895 | C01996 | Up   |
| 10  | N-acetyl-L-aspartic acid                       | HMDB0000812 | C01042 | Up   |
| 11  | uridine diphosphate galactose                  | HMDB0000302 | C00052 | Up   |
| 12  | pantothenic acid                               | HMDB0000210 | C00864 | Up   |
| 13  | uracil                                         | HMDB0000300 | C00106 | Up   |
| 14  | guanosine monophosphate                        | HMDB0001397 | C00144 | Up   |
| 15  | glutathione                                    | HMDB0000125 | C00051 | Up   |
| 16  | cytidine monophosphate N-acetylneuraminic acid | HMDB0001176 | C00128 | Up   |
| 17  | adenosine 5'-monophosphate                     | HMDB0000045 | C00020 | Up   |
| 18  | L-alanine                                      | HMDB0000161 | C00041 | Down |
| 19  | stearic acid                                   | HMDB0000827 | C01530 | Up   |
| 20  | epicatechin                                    | HMDB0001871 | C09727 | Up   |
| 21  | propionylcarnitine                             | HMDB0000824 | C03017 | Up   |
| 22  | mannitol                                       | HMDB0000765 | C00392 | Up   |
| 23  | cytidine monophosphate                         | HMDB0000095 | C00055 | Up   |
| 24  | ADP                                            | HMDB0001341 | C00008 | Up   |
| 25  | citicoline                                     | HMDB0001413 | C00307 | Up   |

Table S4. Differential metabolites in MKN45 and MKN45/R cells.

| No | Metabolites | HMDB | KEGG | tread |
|----|-------------|------|------|-------|
|----|-------------|------|------|-------|

| (MKN45R/MKN45) |                                  |             |        |      |
|----------------|----------------------------------|-------------|--------|------|
| 1              | eicosapentaenoic Acid            | HMDB0001999 | C06428 | Up   |
| 2              | arachidonic acid                 | HMDB0001043 | C00219 | Up   |
| 3              | betaine aldehyde                 | HMDB0001252 | C00576 | Up   |
| 4              | D-erythrose 4-phosphate          | HMDB0001321 | C00279 | Up   |
| 5              | sphinganine                      | HMDB0000269 | C00836 | Down |
| 6              | cholesterol sulfate              | HMDB0000653 | C18043 | Down |
| 7              | glycerophosphocholine            | HMDB0000086 | C00670 | Down |
| 8              | adenosine monophosphate          | HMDB0000045 | C00020 | Down |
| 9              | N-acetyl-glucosamine 1-phosphate | HMDB0001367 | C04256 | Down |
| 10             | mannose 6-phosphate              | HMDB0001078 | C00275 | Up   |
| 11             | tetradecanoylcarnitine           | HMDB0005066 | -      | Up   |
| 12             | lysoPC(16:0)                     | HMDB0010382 | C04230 | Up   |
| 13             | L-lysine                         | HMDB0000182 | C00047 | Up   |
| 14             | 2-methylbutyrylcarnitine         | HMDB0000378 | -      | Down |
| 15             | pyruvic acid                     | HMDB0000243 | C00022 | Down |
| 16             | sanguinarine                     | HMDB0029367 | C06162 | Down |
| 17             | allopurinol                      | HMDB0014581 | -      | Up   |
| 18             | L-tryptophan                     | HMDB0000929 | C00078 | Up   |
| 19             | dihydroxyacetone phosphate       | HMDB0001473 | C00111 | Down |
| 20             | lysoPE(16:0/0:0)                 | HMDB0011503 | -      | Up   |
| 21             | nicotinic acid                   | HMDB0001488 | C00253 | Up   |
